# Supplementary material
Source: HighWire-hosted journal article supplement (https://bmjopen.bmj.com/content/8/3/e020862)
Supplement: inline-supplementary-material-2 [file inline-supplementary-material-2.pdf]

| study | country | facilities | study design | number of patients | ethnicity | sex | age | follow-up duration | prognostic factor<br>(autoantibodies) | clinical outcome | counts of events<br>(comparator 1) | counts of events<br>(comparator 2) | result of univariate analysis | method | result of multivariate analysis | method | adjusted factors |
|-------|---------|------------|--------------|--------------------|-----------|-----|-----|--------------------|---------------------------------------|------------------|------------------------------------|------------------------------------|-------------------------------|--------|---------------------------------|--------|------------------|
|-------|---------|------------|--------------|--------------------|-----------|-----|-----|--------------------|---------------------------------------|------------------|------------------------------------|------------------------------------|-------------------------------|--------|---------------------------------|--------|------------------|

[illegible]
